# Supplementary material
Source: Springer Nature journal article supplement (https://www.springermedizin.de/resource/supplementary/12955_2012_1049_MOESM1_ESM.pdf/9559218)

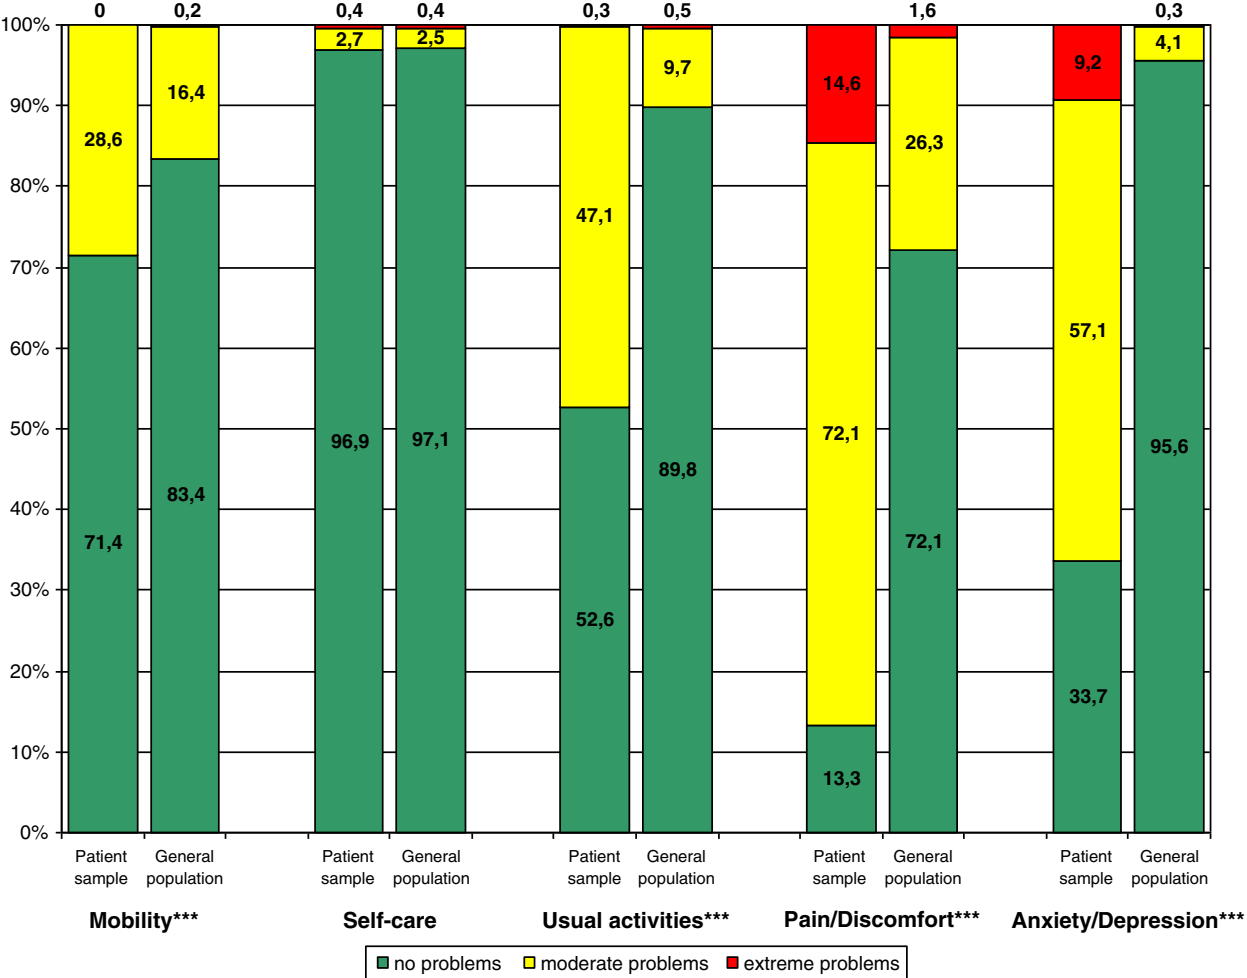

There was 1 missing value for the EQ-5D item usual activities in the patient sample. \*\*\* p < 0.001.

Supplement: MOESM1 [file 9559218]
